# Supplementary material for: ENPP1 deletion causes mouse osteoporosis via the MKK3/p38 MAPK/PCNA signaling pathway
Source: PubMed Central journal article supplement (PMC9571425; doi:10.1186/s13018-022-03349-1), 2022-10-15

Fig.3F

first

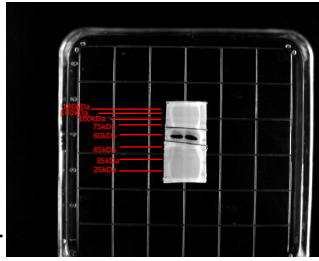

beta-Tubulin1

P-p38

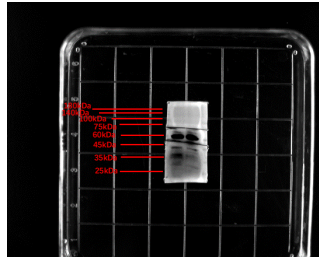

beta-Tubulin2

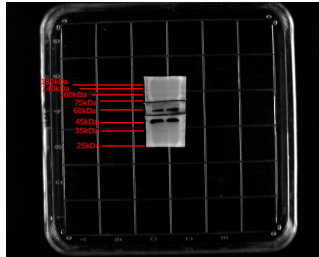

p38

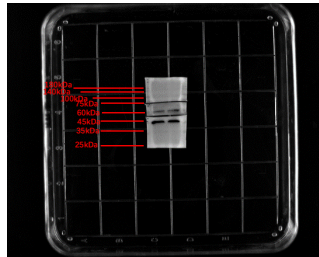

PCNA

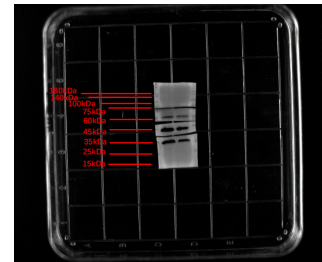

beta-Tubulin3

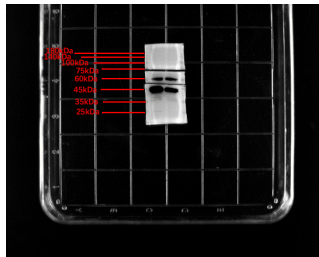

MKK3

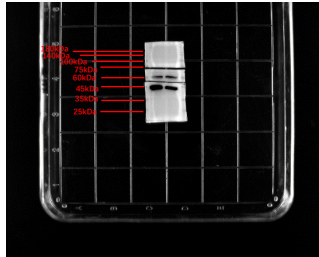

ENPP1

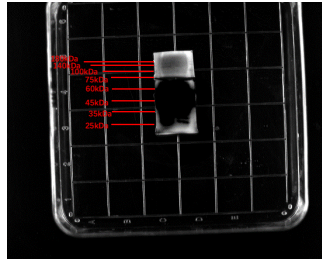

Fig.3F

second

Enpp1

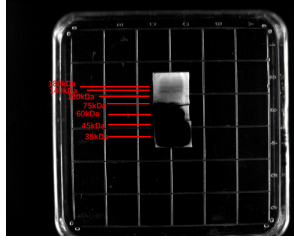

MKK3

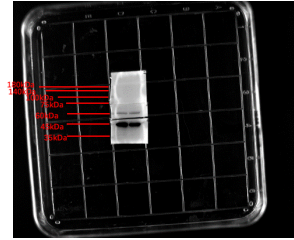

p38

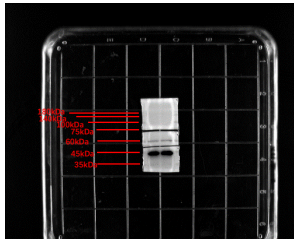

P-p38/  
 $\beta$ -Tubulin

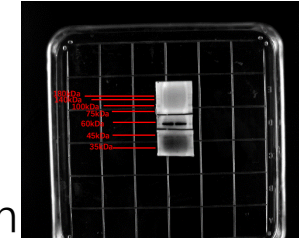

PCNA

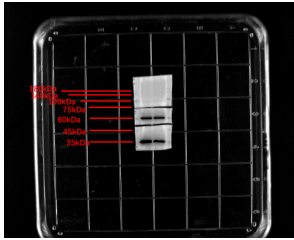

$\beta$ -Tubulin

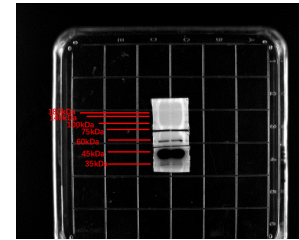

Fig.4C

first

ENPP1

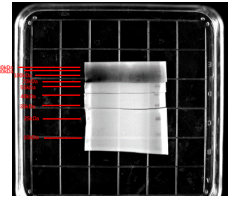

$\beta$ tubulin

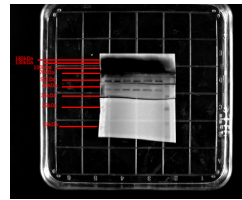

P-p38

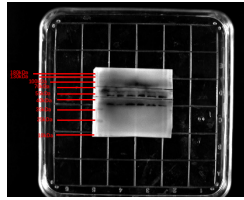

p38

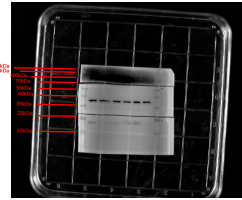

Fig.4C

second

ENPP1

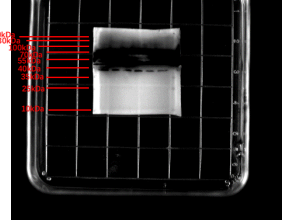

$\beta$ tubulin

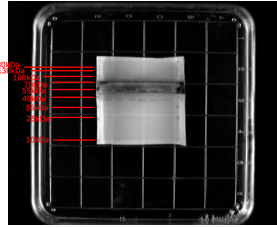

P-p38

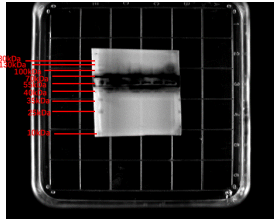

p38

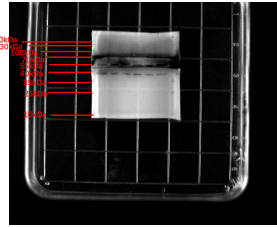

Fig.4C

third

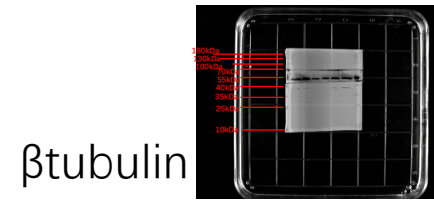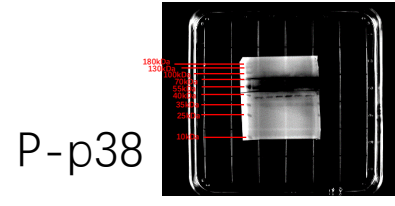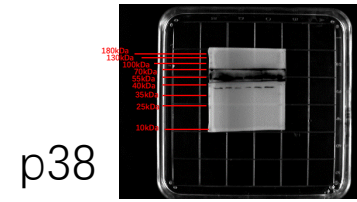

Fig.4E

first

ENPP1

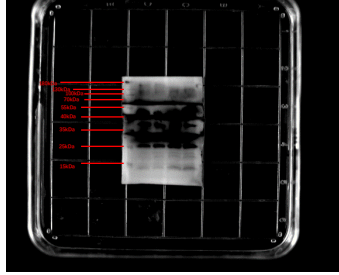

MKK3

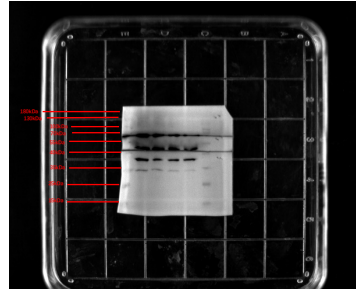

P-p38

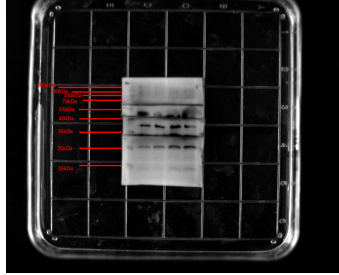

p38

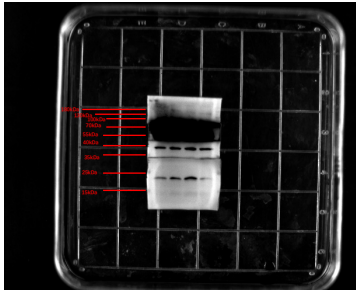

PCNA

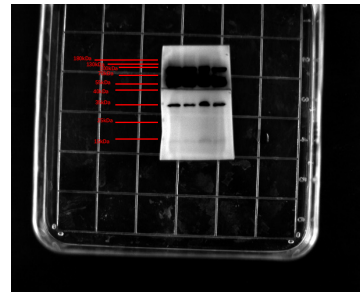

$\beta$ tubulin

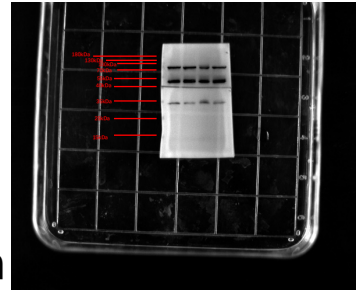

Fig.4E

second

ENPP1

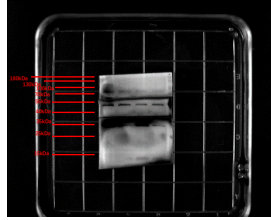

MKK3

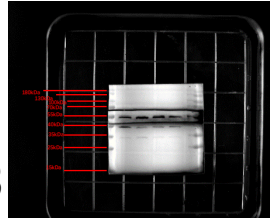

P-p38

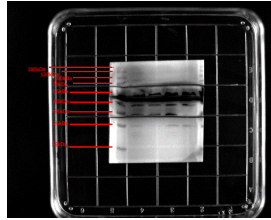

p38

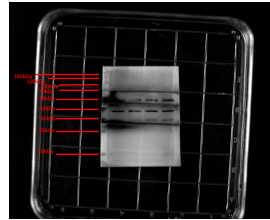

PCNA

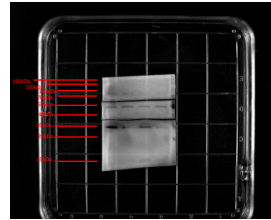

$\beta$ tubulin

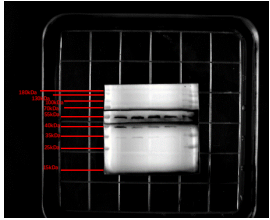

Fig.4E

third

ENPP1

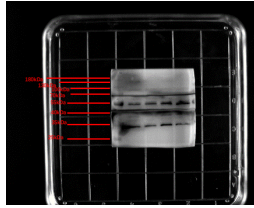

MKK3

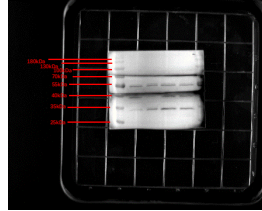

P-p38

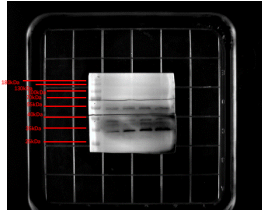

p38

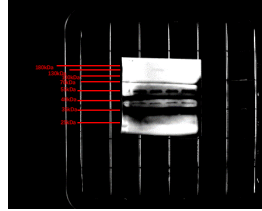

PCNA

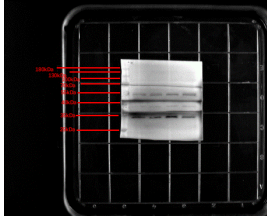

$\beta$ tubulin

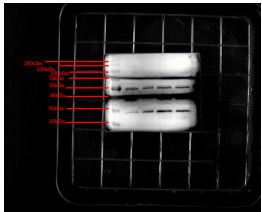

Supplement: 13018_2022_3349_MOESM2_ESM.pdf [file 13018_2022_3349_MOESM2_ESM.pdf]
